# Supplementary material
Source: publisher figshare collection journal article supplement (https://gsajournals.figshare.com/articles/dataset/_/13378799)
Supplement: Supplementary file 1 [file 1]

## Supplementary Information

### ***De novo* whole-genome assembly and resequencing resources for the roan (*Hippotragus equinus*), an iconic African antelope**

Margarida Gonçalves,<sup>\*,†,1</sup> Hans R. Siegismund,<sup>‡</sup> Bettine Jansen van Vuuren,<sup>§</sup> Klaus-Peter Koepfli,<sup>\*\*,††</sup> Nuno Ferrand<sup>\*,†,§</sup> & Raquel Godinho<sup>\*,†,§,1</sup>

<sup>\*</sup>CIBIO, Centro de Investigação em Biodiversidade e Recursos Genéticos, Campus de Vairão, Portugal

<sup>†</sup>Departamento de Biologia, Faculdade de Ciências, Universidade do Porto

<sup>‡</sup>Department of Biology, University of Copenhagen, Denmark

<sup>§</sup>Centre for Ecological Genomics and Wildlife Conservation, Department of Zoology, University of Johannesburg, South Africa

<sup>\*\*</sup>Smithsonian-Mason School of Conservation, Front Royal, VA 22630, USA

<sup>††</sup>Smithsonian Conservation Biology Institute, Center for Species Survival, National Zoological Park, Washington, DC 20008, USA

<sup>1</sup>Corresponding author: CIBIO, Centro de Investigação em Biodiversidade e Recursos Genéticos, Campus de Vairão, Portugal. E-mail: mgoncalves@cibio.up.pt; rgodinho@cibio.up.pt

## TABLES

**TABLE S1.** Genome assembly statistics calculated by Supernova v.2.1.1, using randomly selected reads to achieve 56x depth of coverage.

|                                         | Assembly run |
|-----------------------------------------|--------------|
| Read number (M)                         | 1212.03      |
| Mean read length (bp)                   | 139.50       |
| Raw coverage (x)                        | 60.70        |
| Effective mean coverage (x)             | 39.70        |
| Read two Q30 (%)                        | 80.70        |
| Median insert (bp)                      | 335.00       |
| Proper pairs (%)                        | 90.32        |
| Molecule length (Kbp)                   | 21.57        |
| Heterozygosity distance (bp)            | 636.00       |
| Unbarcoded reads (%)                    | 7.05         |
| N50 reads per barcode (K)               | 0.94         |
| Duplicates (%)                          | 26.01        |
| Phased (%)                              | 48.13        |
| Scaffolds >= 10Kbp (K)                  | 2.20         |
| N50 edge size (Kbp)                     | 30.36        |
| N50 contig size (Kbp)                   | 239.59       |
| N50 phased block size (Mbp)             | 1.40         |
| N50 scaffold size (Mbp)                 | 8.42         |
| Base missing from scaffolds >= 10Kb (%) | 4.10         |
| Assembly size (scaffolds >= 10Kb) (Gbp) | 2.56         |
| Estimated genome size (Gbp)             | 3.01         |

x – covered reads; K – thousand; M – million; bp – base-pairs; Kbp – thousand base-pairs; Mbp – million base-pairs; Gbp – billion base-pairs.

**TABLE S2.** Genome annotation quality assessment using GenomeQC tool, comparing roan antelope with cow reference genome (BosTau9), sable antelope genome and the scimitar-horned oryx genome.

|                                                 | <b>Roan<br/>antelope</b> | <b>Domestic<br/>cow</b> | <b>Sable<br/>antelope</b> | <b>Scimitar-<br/>horned oryx</b> |
|-------------------------------------------------|--------------------------|-------------------------|---------------------------|----------------------------------|
| Number of gene models                           | 30 622                   | 30 589                  | 23 846                    | 28 559                           |
| Minimum gene length                             | 56                       | 45                      | 6                         | 6                                |
| Maximum gene length                             | 1 118 330                | 2 433 917               | 163 506                   | 162 991                          |
| Average gene length                             | 37 281.0                 | 39 806.5                | 16 709.8                  | 16 128.4                         |
| Number of transcripts                           | 25 139                   | 66 643                  | 23 846                    | 28 559                           |
| Average number of transcripts<br>per gene model | 2.0                      | 2.2                     | 1.0                       | 1.0                              |

**TABLE S3.** Alignment statistics of the roan antelope genome against the domestic cow reference genome (BosTau9), per chromosome. A complete description of roan scaffolds alignment to each domestic cow chromosome is provided in Table S4.

|       | <b>Identity (%)</b> | <b>Mapped bp (N)</b> | <b>Mapped scaffolds (N)</b> | <b>Mapping (%)</b> |
|-------|---------------------|----------------------|-----------------------------|--------------------|
| chr1  | 92.89               | 155 462 201          | 32                          | 98.06              |
| chr2  | 93.03               | 134 758 668          | 41                          | 98.92              |
| chr3  | 93.00               | 116 791 714          | 64                          | 96.52              |
| chr4  | 92.91               | 116 204 881          | 28                          | 96.84              |
| chr5  | 92.88               | 114 968 136          | 52                          | 95.74              |
| chr6  | 92.81               | 115 955 195          | 24                          | 98.43              |
| chr7  | 92.92               | 106 359 928          | 68                          | 96.09              |
| chr8  | 92.97               | 110 519 018          | 43                          | 97.53              |
| chr9  | 92.82               | 102 494 769          | 16                          | 97.19              |
| chr10 | 92.99               | 98 360 627           | 29                          | 95.21              |
| chr11 | 92.83               | 105 507 747          | 26                          | 98.62              |
| chr12 | 92.51               | 83 334 402           | 23                          | 95.55              |
| chr13 | 92.84               | 79 717 752           | 32                          | 95.50              |
| chr14 | 92.85               | 80 159 661           | 21                          | 97.28              |
| chr15 | 92.77               | 70 396 358           | 44                          | 82.81              |
| chr16 | 92.72               | 77 921 579           | 39                          | 96.18              |
| chr17 | 92.55               | 71 298 713           | 28                          | 97.45              |
| chr18 | 92.65               | 61 678 633           | 58                          | 93.71              |
| chr19 | 92.49               | 60 956 150           | 40                          | 96.07              |
| chr20 | 92.61               | 69 947 538           | 8                           | 97.18              |
| chr21 | 92.65               | 67 359 392           | 61                          | 96.42              |
| chr22 | 92.50               | 59 787 467           | 21                          | 98.38              |
| chr23 | 92.45               | 46 624 102           | 38                          | 88.81              |
| chr24 | 92.62               | 61 424 422           | 16                          | 98.57              |
| chr25 | 92.14               | 41 507 042           | 19                          | 98.01              |
| chr26 | 92.54               | 49 906 710           | 27                          | 95.99              |
| chr27 | 92.37               | 43 147 230           | 12                          | 94.60              |
| chr28 | 92.55               | 44 358 876           | 29                          | 96.56              |
| chr29 | 92.25               | 48 728 272           | 27                          | 95.36              |
| chrX  | 93.30               | 115 206 517          | 261                         | 82.88              |

## FIGURES

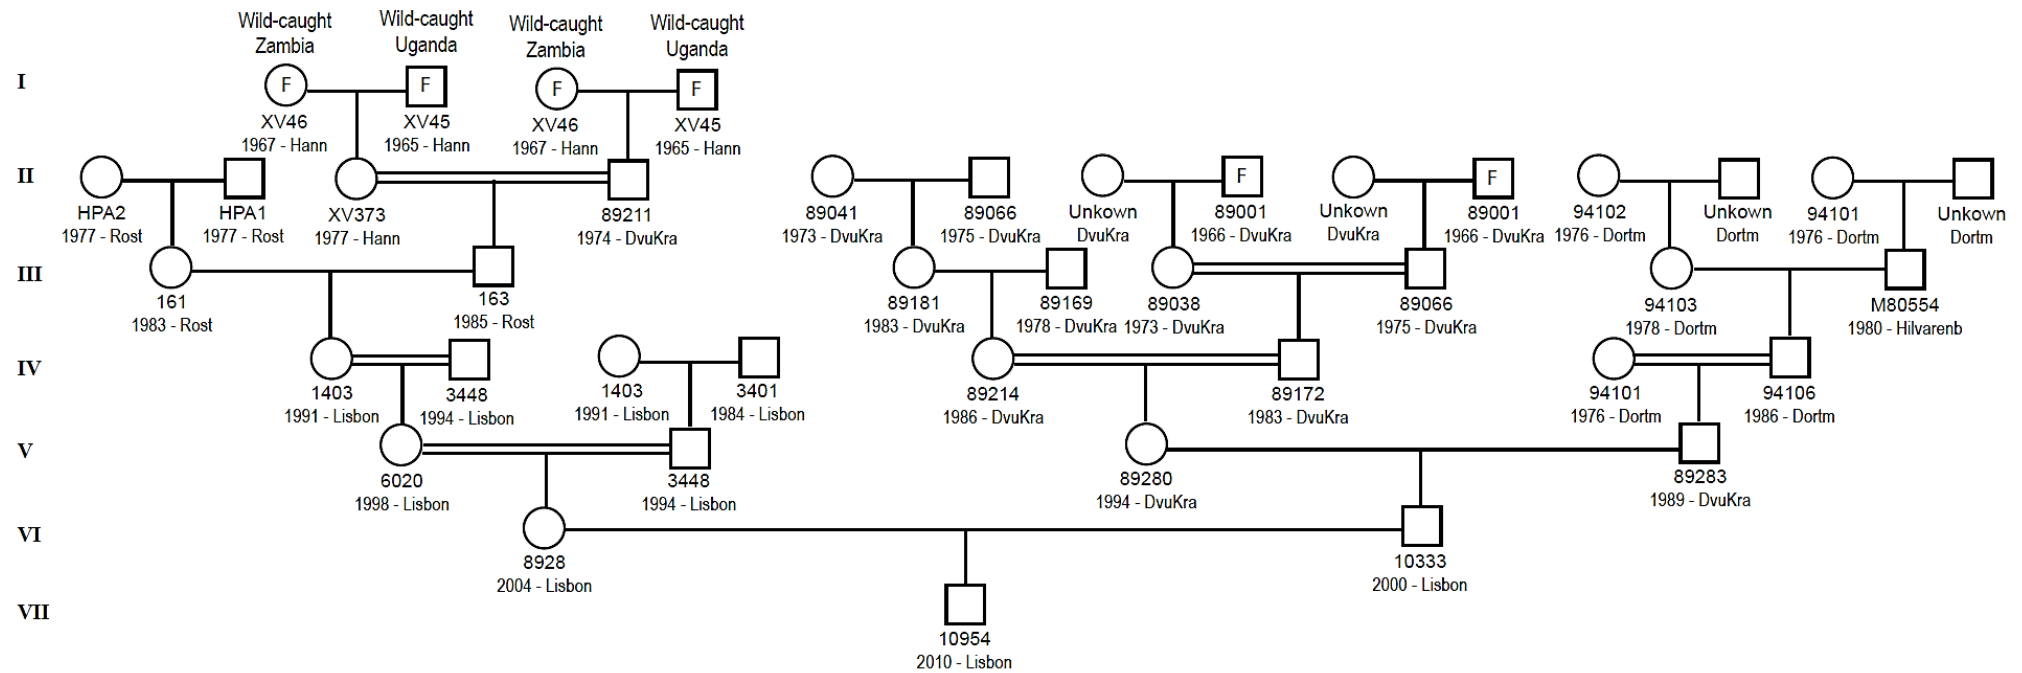

Lisbon - Lisbon Zoo (Portugal)  
DvuKra - Safari Park Dvur Králové (Czech Republic)  
Dortm - Dortmund Zoo (Germany)  
Rost - Rostock Zoo (Germany)  
Hilvarenb - Hilvarenbreek Zoo (Netherlands)  
Hann - Hannover Zoo (Germany)

F - Zoo Founder

**FIGURE S1.** Pedigree of roan antelope individual ID:10954, used to produce the assembled genome. Six generations are depicted, indicated by Roman numbers, with generation I made up of wild-caught individuals to become zoo founders (F). Males are indicated by squares and females by circles. Consanguineous matings are indicated by double line connections between male and female. Each individual is identified by an ID code, year of birth and zoo name. Adapted from pedigree made available by the Lisbon Zoo.

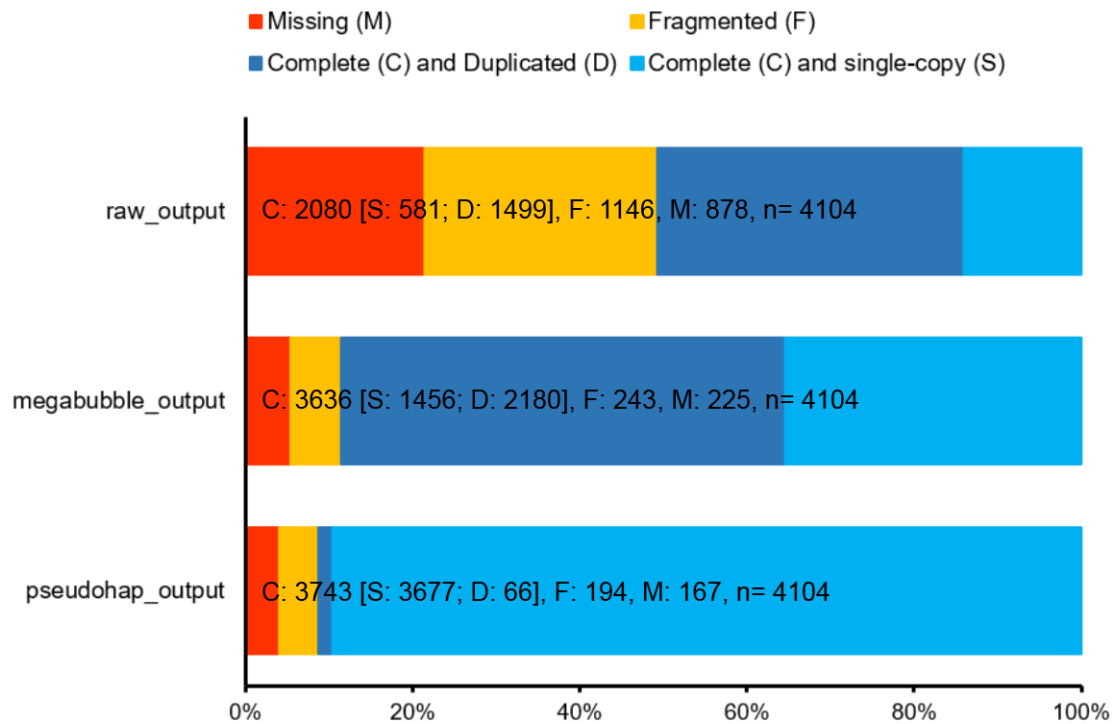

**FIGURE S2.** Plot comparing gene completeness of the roan genome assembly according to BUSCO v.3.0.2 percentage scores, among the three Supernova assembly output styles: raw; megabubble; and pseudohaplotyp. BUSCO scores were estimated using the Mammalia OrthoDB v9 gene set, containing 4,104 genes. Total number of genes falling into the four categories, according to the legend and colour code.
